# Supplementary material for: Orosomucoid 1 promotes colorectal cancer progression and liver metastasis by affecting PI3K/AKT pathway and inducing macrophage M2 polarization
Source: Springer Nature journal article supplement (doi:10.1038/s41598-023-40404-1), 2023-08-28
Supplement: MOESM1 [file 41598_2023_40404_MOESM1_ESM.pdf]

**Fig S1****A**

| Dataset  | Normal<br>Colon<br>Epithelium | Primary<br>Tumor | Liver<br>Metastases | Platform |
|----------|-------------------------------|------------------|---------------------|----------|
| GSE14297 | 7                             | 18               | 18                  | GPL6370  |
| GSE49355 | 18                            | 20               | 19                  | GPL96    |
| GSE81558 | 9                             | 23               | 19                  | GPL15207 |

**B**

| Regulation              | DEGs                                                                                                                                                                                                                                                                                                                                                                                                                                                                                                                                                                                                                                                                            |
|-------------------------|---------------------------------------------------------------------------------------------------------------------------------------------------------------------------------------------------------------------------------------------------------------------------------------------------------------------------------------------------------------------------------------------------------------------------------------------------------------------------------------------------------------------------------------------------------------------------------------------------------------------------------------------------------------------------------|
| Upregulated<br>(n=102)  | CRP, FGA, ORM1, FGB, APOA1, ALB, HP, AMBP, GC, APOA2, TF, FGL1, CYP2E1, ORM2, VTN, F2, FGG, HPX, APOC3, AHSG, APOB, SERPINC1, HRG, KNG1, SERPINA3, APCS, LBP, CYP2C8, TTR, ITIH1, C4BPA, PLG, APOC1, ITIH2, AGXT, C6, HPD, SAA4, APOH, APOC2, C5, RBP4, C8A, FCN3, CP, F9, ASGR1, CPB2, CPS1, COLEC11, IGFBP1, CYP2C9, C8B, AOX1, C3, FMO3, SERPINA6, TAT, SERPINA5, ANGPTL3, ASGR2, APOE, HPR, SLC2A2, RDH16, C8G, ARG1, ALDOB, SERPIND1, SAA2, HSD11B1, HABP2, GATM, PAH, VNN1, SERPINA7, CYP3A4, AQP9, DPYS, F5, SPP1, PON3, CDH2, AKR1C4, MAT1A, UPB1, MBL2, SERPING1, SERPINA1, CDO1, CFH, LECT2, SERPINA10, CFHR1, SLC22A1, DEFB1, SAA1, C4BPB, HYAL1, MTTP, ADH1B, AADAC |
| Downregulated<br>(n=15) | ANGPTL2, FBLN1, FOXF1, DES, MMP1, MYH11, GREM1, CTSK, VWF, SPARCL1, CXCL14, MMP3, ACTG2, FCGBP, SPINK4                                                                                                                                                                                                                                                                                                                                                                                                                                                                                                                                                                          |

**Supplementary Figure 1. DEGs between LM and primary tumors (PT) of CRC**

**(A)** Gene expression data extracted from three GEO datasets. **(B)** List of consistent DEGs, including 102 upregulated DEGs and 15 downregulated DEGs.

**Fig S2**

**A**

| Rank | Name     | Type | Score |
|------|----------|------|-------|
| 1    | ALB      | up   | 74    |
| 2    | FGA      | up   | 63    |
| 3    | AHSG     | up   | 60    |
| 4    | FGG      | up   | 59    |
| 5    | APOA1    | up   | 58    |
| 5    | APOB     | up   | 58    |
| 7    | SERPINC1 | up   | 57    |
| 8    | F2       | up   | 56    |
| 9    | APOH     | up   | 55    |
| 10   | FGB      | up   | 54    |
| 11   | APOC3    | up   | 52    |
| 11   | ORM1     | up   | 52    |
| 13   | TTR      | up   | 51    |
| 14   | ORM2     | up   | 49    |
| 15   | C3       | up   | 48    |
| 15   | HP       | up   | 48    |
| 15   | GC       | up   | 48    |
| 18   | VTN      | up   | 47    |
| 18   | APOA2    | up   | 47    |
| 18   | SERPINA1 | up   | 47    |

**B**

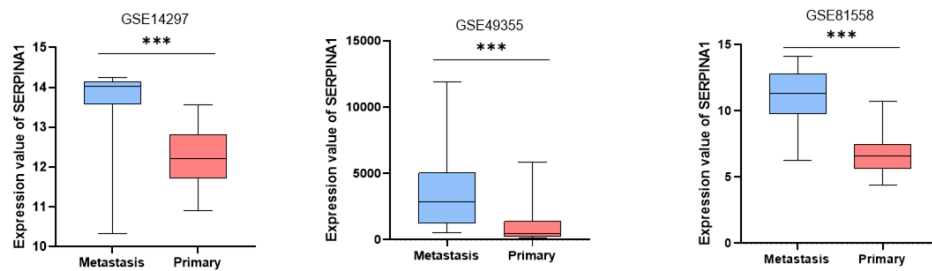

### Supplementary Figure 2. Construction of PPI network and hub gene determination

(A) List of top 20 hub genes with a higher degree of connectivity in DEGs. (B) The expression of SERPINA1 between liver metastases and primary tumors of CRC in datasets GSE14297, GSE49355, and GSE81558 respectively. Data are expressed as mean  $\pm$  SD. \*\*\*p < 0.001 (unpaired t test or ANOVA).

**Fig S3**

**A**

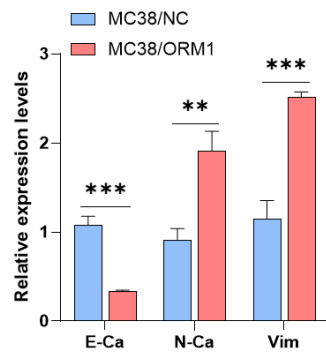

**B**

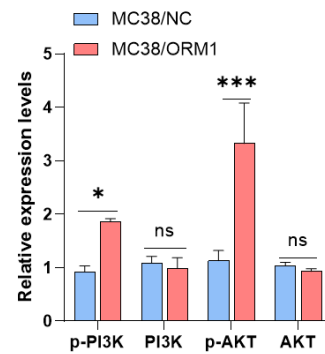

**Supplementary Figure 3. ORM1 induces EMT, promotes the proliferative, migratory, and invasive activities of colon cancer cells, and affects the PI3K/AKT pathway**

(A) The relative expression levels of EMT-related markers E-cadherin (E-Ca), N-cadherin (N-Ca), and Vimentin (Vim) in ORM1-overexpressing MC38 cells. (B) The relative expression levels of p-PI3K, PI3K, p-AKT, and AKT in ORM1-

overexpressing MC38 cells. Data are expressed as mean  $\pm$  SD. ns  $p \geq 0.05$ , \* $p < 0.05$ ,

\*\* $p < 0.01$ , \*\*\* $p < 0.001$  (unpaired t test or ANOVA).
